# Supplementary material
Source: publisher site journal article supplement (https://www.dovepress.com/article/340939)
Supplement: Supplementary file 1 [file get_supplementary_file.php]

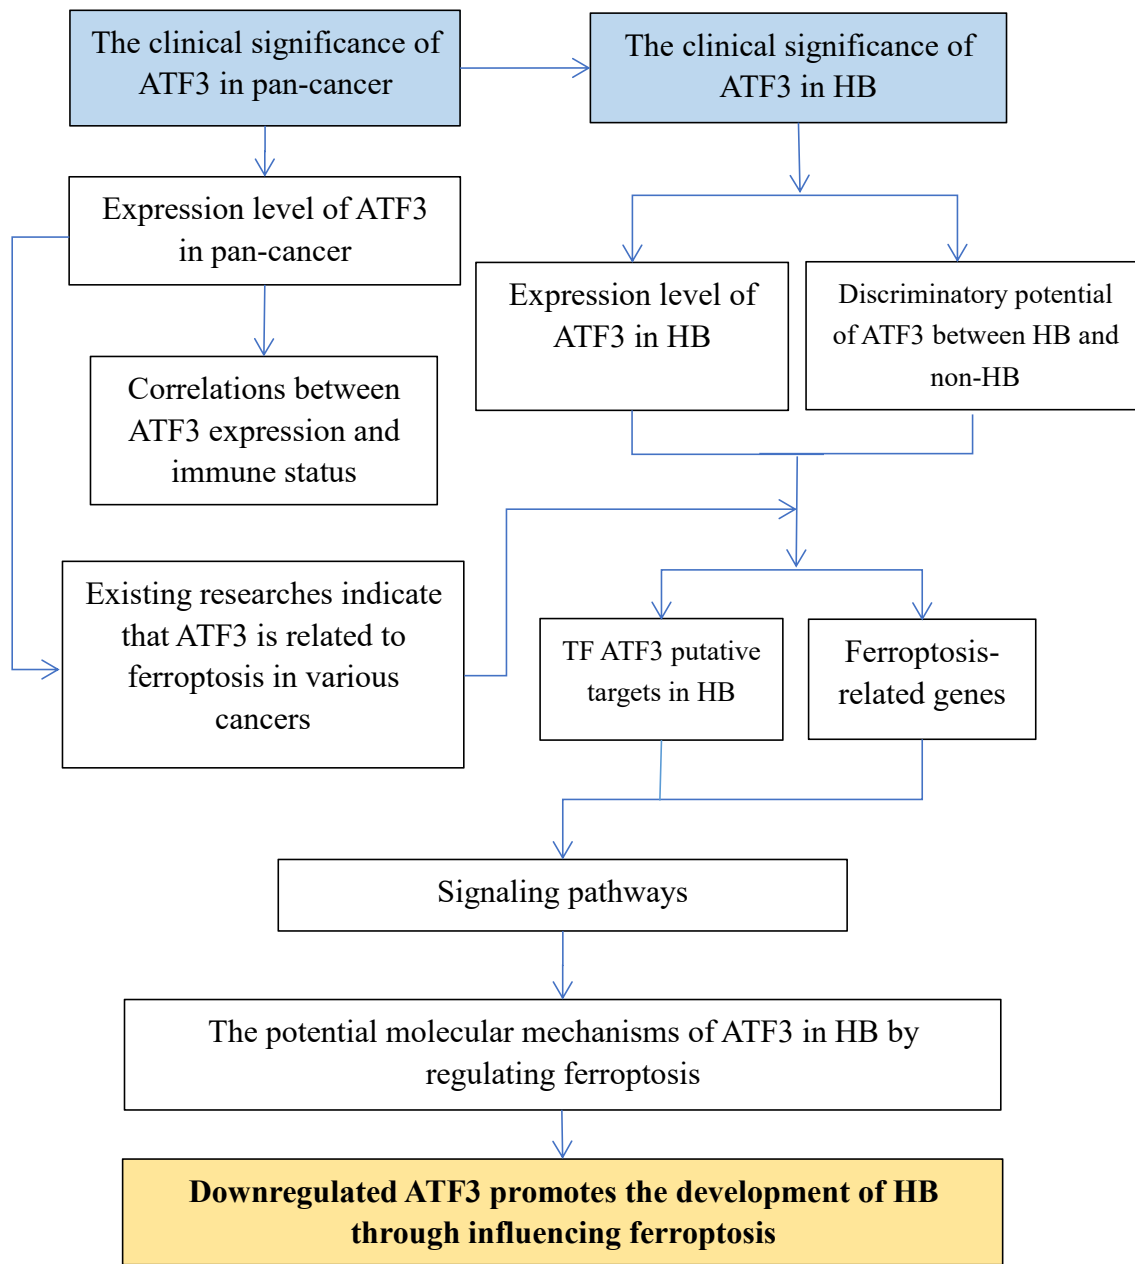

**Supplementary material 1** The research flow of the present study. ATF3, activating transcription factor 3; HB, hepatoblastoma; non-HB, non-hepatoblastoma.

## Identification of studies via databases and registers

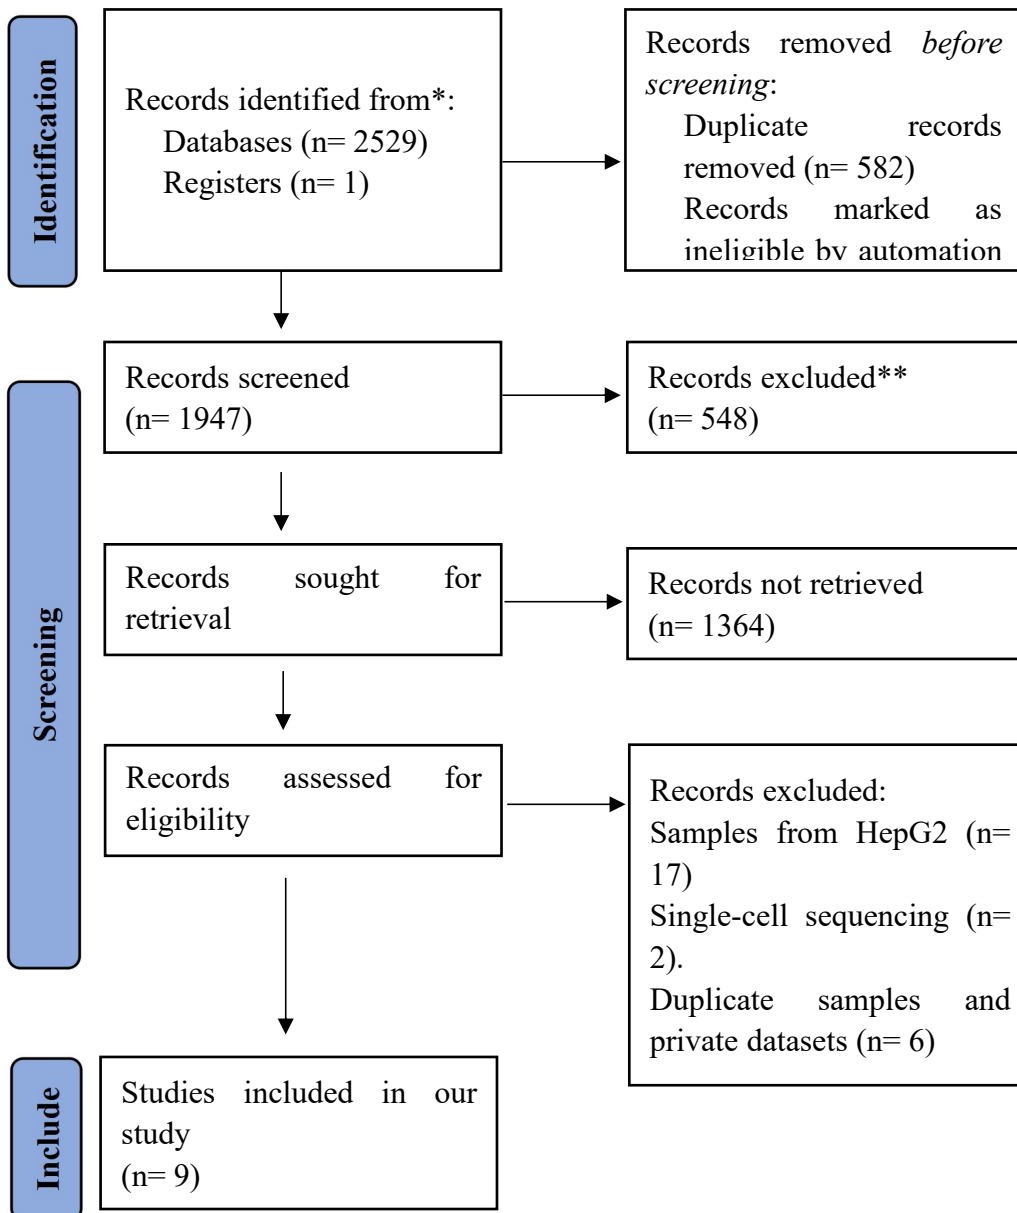

Supplementary material 2 The flow chart of datasets filtering process.
